# Supplementary material
Source: HighWire-hosted journal article supplement (https://erj.ersjournals.com/content/54/3/1900275)
Supplement: inline-supplementary-material-1 [file inline-supplementary-material-1.pdf]

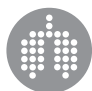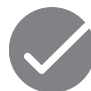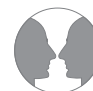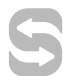

SHAREABLE PDF

# Opioids for breathlessness: psychological and neural factors influencing response variability

Sara J. Abdallah<sup>1,3</sup>, Olivia K. Faull<sup>2,3</sup>, Vishvarani Wanigasekera<sup>2</sup>, Sarah L. Finnegan<sup>2</sup>, Dennis Jensen<sup>1</sup> and Kyle T.S. Pattinson<sup>2</sup>

**Affiliations:** <sup>1</sup>Clinical Exercise & Respiratory Physiology Laboratory, Dept of Kinesiology & Physical Education, McGill University, Montréal, QC, Canada. <sup>2</sup>Wellcome Centre for Integrative Neuroimaging and Nuffield Division of Anaesthetics, Nuffield Dept of Clinical Neurosciences, University of Oxford, Oxford, UK. <sup>3</sup>Joint first authors.

**Correspondence:** Kyle Pattinson, Nuffield Dept of Clinical Neurosciences, West Wing Level 6, John Radcliffe Hospital, Oxford, OX3 9DU, UK. E-mail: [kyle.pattinson@nda.ox.ac.uk](mailto:kyle.pattinson@nda.ox.ac.uk)

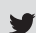

@ERSpublications

**Diminished opioid efficacy in the treatment of breathlessness is related to negative affect and anticipatory brain activity in the anterior cingulate and medial prefrontal cortex.** <http://bit.ly/2LXyyDo>

**Cite this article as:** Abdallah SJ, Faull OK, Wanigasekera V, *et al.* Opioids for breathlessness: psychological and neural factors influencing response variability. *Eur Respir J* 2019; 54: 1900275 [<https://doi.org/10.1183/13993003.00275-2019>].

This single-page version can be shared freely online.

## To the Editor:

Chronic breathlessness is a multidimensional and aversive symptom, which is often poorly explained by underlying pathophysiology [1]. For many sufferers, breathlessness is refractory to maximal medical therapies that target disease processes [2]. However, opioids are thought to be a possible therapeutic avenue to treat symptomology independently of disease [3]. Importantly, research in chronic pain has demonstrated that qualities such as anxiety and depression (collectively termed negative affect here) can both exacerbate symptoms [4] and reduce opioid efficacy [5, 6]. Therefore, it may be pertinent to consider such behavioural factors when contemplating the use of opioids for breathlessness.
